# Supplementary material
Source: publisher figshare collection journal article supplement (https://gsapubs.figshare.com/ndownloader/files/23296889)
Supplement: Supplementary file 1 [file 23296889]

## Magmatic Eruptions and Iron Volatility in Deep-Sea Hydrothermal Fluids

**Authors:** Nicholas J. Pester, Kang Ding and William E. Seyfried, Jr.

This file contains the following **Supplementary Information** to the above manuscript:

Methods

Supplementary Figures DR1 - DR5

Supplementary Tables DR1 - DR6

### Methods

**Experimental Apparatus.** Hydrothermal flow-through experiments were conducted at temperatures between 410 °C and 465 °C and pressures coincident with vapor-liquid/vapor-halite stability (220 – 400 bars) in NaCl dominated fluids (See Tables DR1-DR5 for details). The experiments were carried out in one of two similar pressure vessels constructed of different materials. Experiments 1 – 2 were conducted in a 316 stainless steel reactor (~110 cm<sup>3</sup>), whereas experiments 3 – 5 utilized a newly designed Ti-alloy reactor (~165 cm<sup>3</sup>). The experimental design is similar to that described in Foustoukos and Seyfried (2007b) with modifications as shown in Fig. DR2. For the Ti-alloy cell, all wetted accessory tubing/valves (including the pump head) were also constructed of Ti with exception of the output back-pressure regulating valve (316 ss), which operates at ambient temperature. A Ti-sheathed Type E (chromel-constantan) thermocouple was used for internal monitoring of the Ti-alloy cell. Uncertainties in pressure are constrained by the capability of the computer-controlled back-pressure regulator ( $\pm 0.5$  bars under experimental conditions). This regulator is an air actuated (dome-loaded) valve connected to an ER3000<sup>TM</sup> electronic pressure controller (Tescom Industrial Controls). Vapor samples were collected after having passed through the back-pressure regulator to avoid any unnecessary decreases in pressure. This is important due to the *P-T* sensitivity of vapor chlorinity near critical conditions (Driesner and Heinrich, 2007). As such, liquid samples were only taken after

sufficient vapor sample had been acquired. Though operating at ambient temperature, there was still concern of metal contamination for the most dilute and acidic vapors due to contact with 316ss in the valve. However, a test using 0.05 N HCl (trace-metal grade) for similar residence times showed no meaningful metal contamination. In experiment 5 (Fig. 2), a computer controlled Ti metering valve was utilized to completely eliminate possible contamination, and in this case pressure variability was  $\pm 2 - 3$  bars.

**Experimental Procedures.** All starting solutions were prepared with deionized H<sub>2</sub>O and ACS grade chloride salts. The bulk concentrations of Fe and Mn were set at levels consistent with those of natural hydrothermal fluids (1 – 10 mmol/kg). All solutions were titrated to a pH of  $\sim 3.0$  with HCl prior to the addition of variably small amounts of formic acid. Upon heating, formic acid dissociates to equimolar amounts of CO<sub>2</sub> and H<sub>2</sub> and was used to assure the  $f_{H_2}$  in the cell was adequate to maintain redox sensitive Fe and Mn in the +2 state in solution. As such, measured H<sub>2</sub> concentrations in the single/vapor phases ranged 2.5 to 16 mmol/kg.

Throughout the experiments (and for 24 hours prior), all starting solutions were continuously purged with N<sub>2</sub> directly in the reservoir of the delivery pump to remove dissolved oxygen. The reactor (at ambient conditions) was also flushed with N<sub>2</sub>, which was subsequently displaced by introduction of the source fluid. The cell was then heated to the desired temperature using the back-pressure regulator to maintain a setpoint  $\sim 20$  bars above the fluid's critical point. High-temperature, single-phase flow was maintained until steady-state pH (25 °C) and dissolved gas concentrations (e.g. CO<sub>2</sub> and H<sub>2</sub>, measured by gas chromatography) were achieved. Once achieved, a fluid sample was acquired. The chemical composition of this sample was compared to the reservoir solution to assure the chemical continuity of the system. The %RSD ( $2\sigma$ ) between the unreacted start solution and the reacted (single-phase) solution was always less than 6%.

While flowing continuously, the two-phase region was typically approached by decreasing the set  $P$  on the back-pressure regulator along a given isotherm. At conditions in the two-phase region, flow rate of the source fluid was typically 0.1 – 0.3 cm<sup>3</sup>/min, which was sufficient to achieve steady-state vapor chlorinity in good agreement with values predicted for equilibrium in the NaCl-H<sub>2</sub>O system (Driesner and Heinrich, 2007). When a new  $P$ - $T$  set-point was established, refractive index, pH (25 °C) and dissolved gas concentrations were monitored

until the new steady-state vapor composition was achieved. Usually only 15 – 20 minutes were required to achieve steady-state, however, fluid was allowed to flow for at least 45 minutes prior to acquiring vapor samples. Large samples of the highly dilute vapors (~10 – 20 g) were taken, which is a distinct advantage of the flow-through reactor configuration. Liquid-phase samples were acquired (after sufficient passage of fluid to rinse the sample line) by opening a flow-regulating valve (Ti). Samples for metal analysis were immediately acidified with trace-metal grade HCl.

Cl was analyzed by ion chromatography ( $2\sigma$ :  $\pm 1\%$ ) and all cations (e.g. Na, Fe, Mn) were analyzed by inductively-coupled plasma optical emission spectroscopy (ICP-OES) with uncertainties of  $\pm 4\%$  ( $2\sigma$ ). pH (25 °C) was measured using a Thermo-Ross electrode that was calibrated often during each sampling session. Charge balance (including pH) was confirmed to be within analytical uncertainty. Chemical data (and associated  $P$ - $T$  conditions) from experiments 1-5 are reported in Tables DR1-DR5, where sample designations S, V and L are the starting fluid/single phase, vapors and liquids, respectively.

**Fluid Chemistry from EPR, 9°50'N.** Previously unpublished data from Bio 9, Bio 9' and P vent, incorporated into time-series data analyses, are given in Table DR6. Fluid samples were acquired in February 2004 and December 2007 – January, 2008 as part of *R/V Atlantis/DSV Alvin* expeditions AT-11-07 and AT-15-28 to the East Pacific Rise, respectively. Details regarding sample acquisition, analyses and analytical uncertainties are given in Pester et al. (2011). Samples were of high quality (i.e. minimal seawater was entrained during sampling) as exhibited by the minimum Mg concentrations ( $Mg_{min}$ ). Data are reported as end-members derived by extrapolation to zero Mg to account for any seawater mixing (Von Damm, 2000). Reported errors are the greater of either the analytical uncertainty ( $2\sigma$ ) or the 95% confidence interval of the extrapolation.

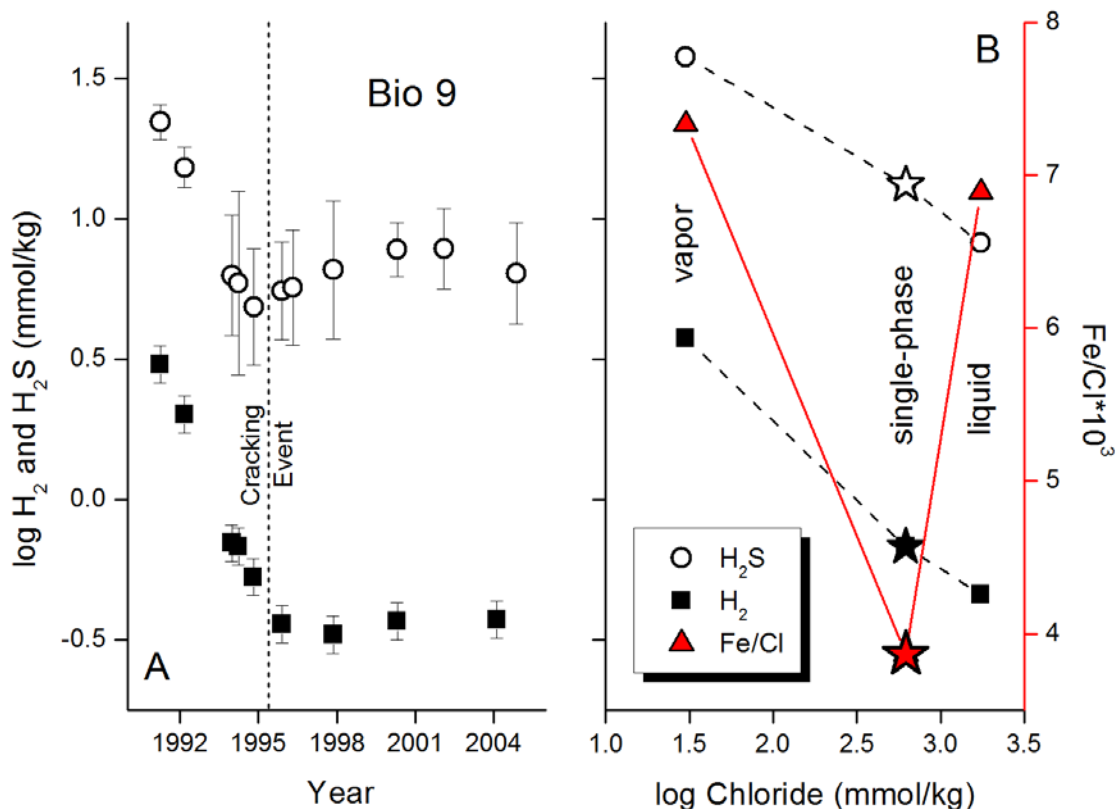

**Supplementary Fig. DR1.** Panel A: Time-series H<sub>2</sub> and H<sub>2</sub>S concentrations in Bio 9 vent fluid (Von Damm, 2000, 2004; Von Damm and Lilley, 2004, Table DR6). The greatest concentrations are observed during the 1991 eruption. Values subsequently decline until steady-state is achieved (see also Fig. 1). Panel B: Experimental data from Foustoukos and Seyfried (2007a). A NaCl dominated fluid was initially equilibrated with PPM (redox buffer) and K-feldspar-muscovite-quartz (pH buffer) at near critical (single-phase) conditions (390 °C, 283 bars, star symbols), then subsequently re-equilibrated in the two-phase region (390 °C, 251 bars). The Fe/Cl ratio (red, right axis) of both the evolved vapor and liquid was twice that of the single phase. The vapor concentrations of H<sub>2</sub> and H<sub>2</sub>S (left axis) also increased substantially (similar in magnitude to those observed for Bio 9 in Panel A) due to high solubility in low density vapors.

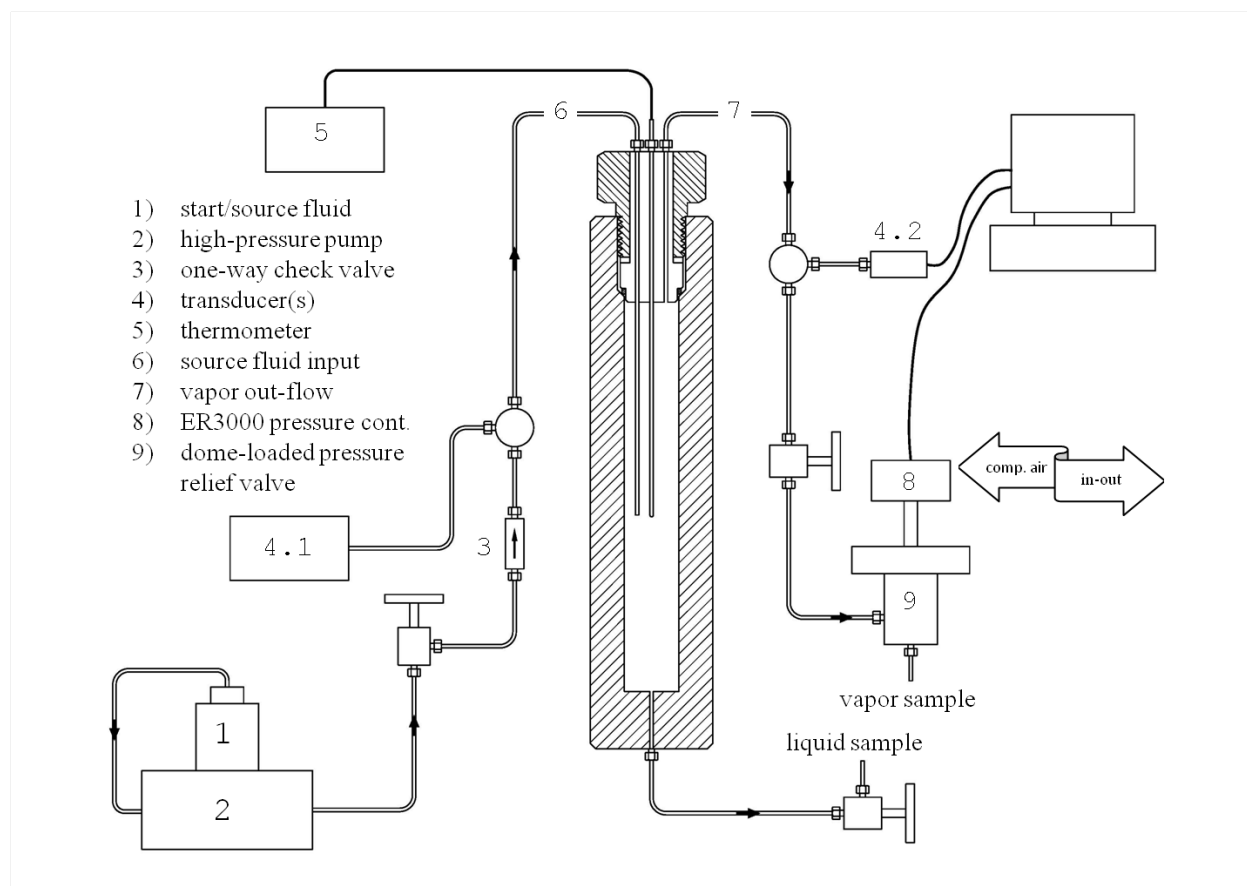

**Supplementary Fig. DR2.** Schematic diagram of the experimental flow system and Ti-alloy reaction cell used for the present study. The source fluid input line (6) terminates in the middle of the cell as does the internal (Ti-sheathed) thermocouple where temperature is logged by a digital thermometer (5). The external thermocouples and heating coils related to cell temperature control are not shown for clarity. Static pressure is maintained via computer interface between a transducer (4.2) and the ER3000™ unit (8) containing solenoid valves that rapidly inlet/exhaust compressed air to the dome of the pressure relief valve (9). Liquid samples were periodically retrieved using a manual valve. See Methods for further details.

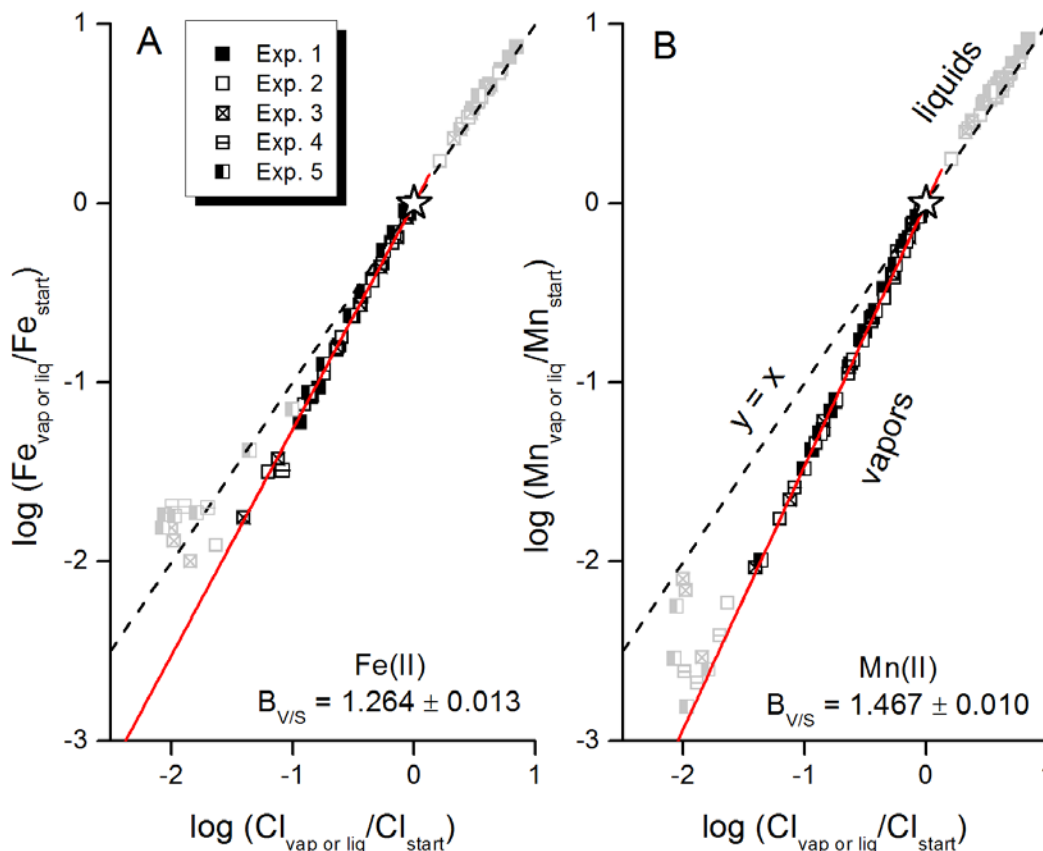

**Supplementary Fig. DR3.** Experimental data normalized for extraction of vapor-based partition coefficients ( $B_{V/S}$ , see below) for A) Fe(II) and B) Mn(II). See Tables DR1-DR5 for experimental conditions and fluid compositions. Vapor data showing no evidence of volatility are regressed (solid, red line) through the origin (and critical point, star symbol). Thus, the slope constitutes the partition coefficient  $B_{V/S}$ , where  $\log (M_{\text{vap}}/M_{\text{start}}) = B_{V/S} * \log (Cl_{\text{vap}}/Cl_{\text{start}})$ ; and  $M_{\text{vap}}$ ,  $Cl_{\text{vap}}$  and  $M_{\text{start}}$ ,  $Cl_{\text{start}}$  are the metal and Cl concentrations in the vapor and starting solutions, respectively. The reported error of  $B_{V/S}$  is the 95% confidence interval. This allows modeling the effects of phase separation on discrete (NaCl-dominated) solutions (i.e.  $B_{V/S}$  value of Na is unity) following derivation of the relationships:  $\log (Fe/Cl) = 0.264 * \log Cl$  and  $\log (Mn/Cl) = 0.467 * \log Cl$  (as demonstrated in Fig. 2). Liquid-phase data and volatile vapor data not included in the regressions are shown in grey scale. The liquid phase data show little deviation from the line of unit slope (dashed,  $y = x$ ).

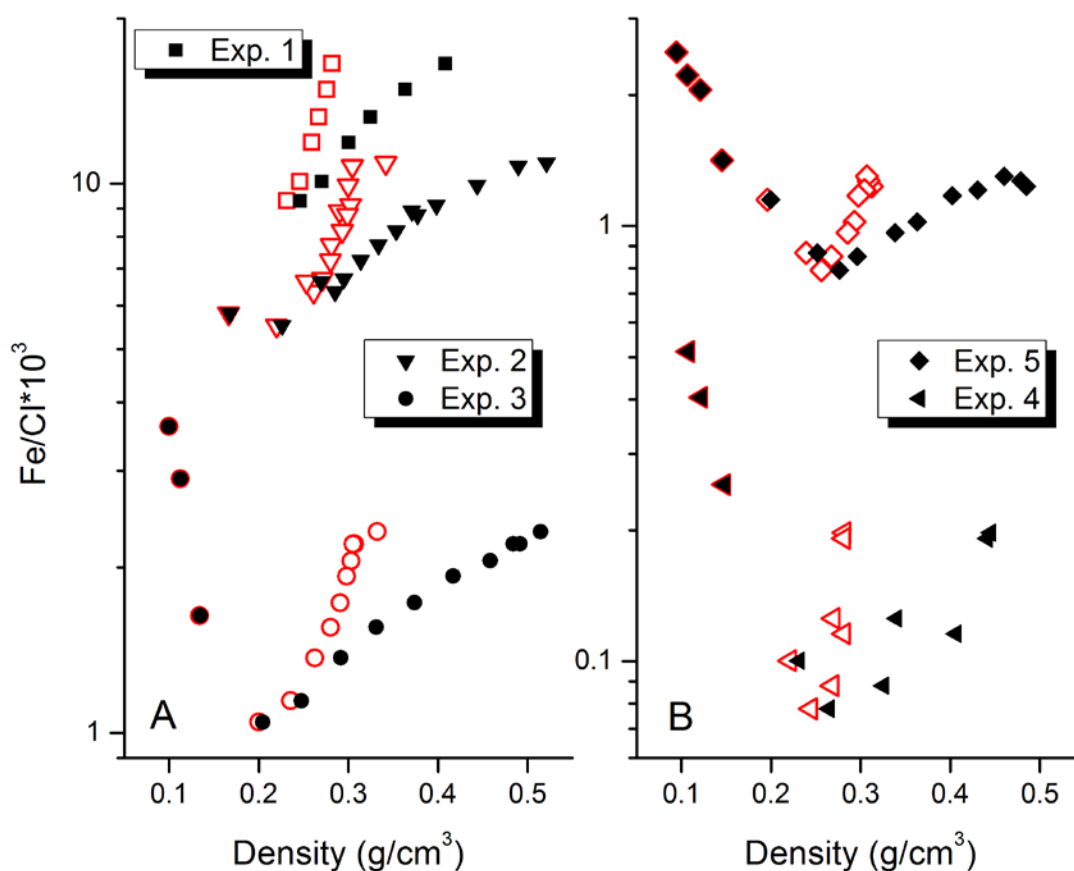

**Supplementary Fig. DR4.** Density vs. Fe/Cl of the vapors in A) experiments 1 – 3 and B) experiments 4 – 5 (note different y-axis scales). See Tables DR1-DR5 for additional experimental details. Filled symbols are the NaCl-H<sub>2</sub>O densities at the measured  $P$ - $T$ - $x$  for the vapors (Driesner and Heinrich, 2007) whereas the open symbols are the density of pure H<sub>2</sub>O at the same  $P$  and  $T$  (IAPWS-95). All experiments show the onset of Fe volatility coincides with where the vapors have become sufficiently dilute that the density is essentially equivalent to pure H<sub>2</sub>O ( $\sim 0.23 \text{ g/cm}^3$ ).

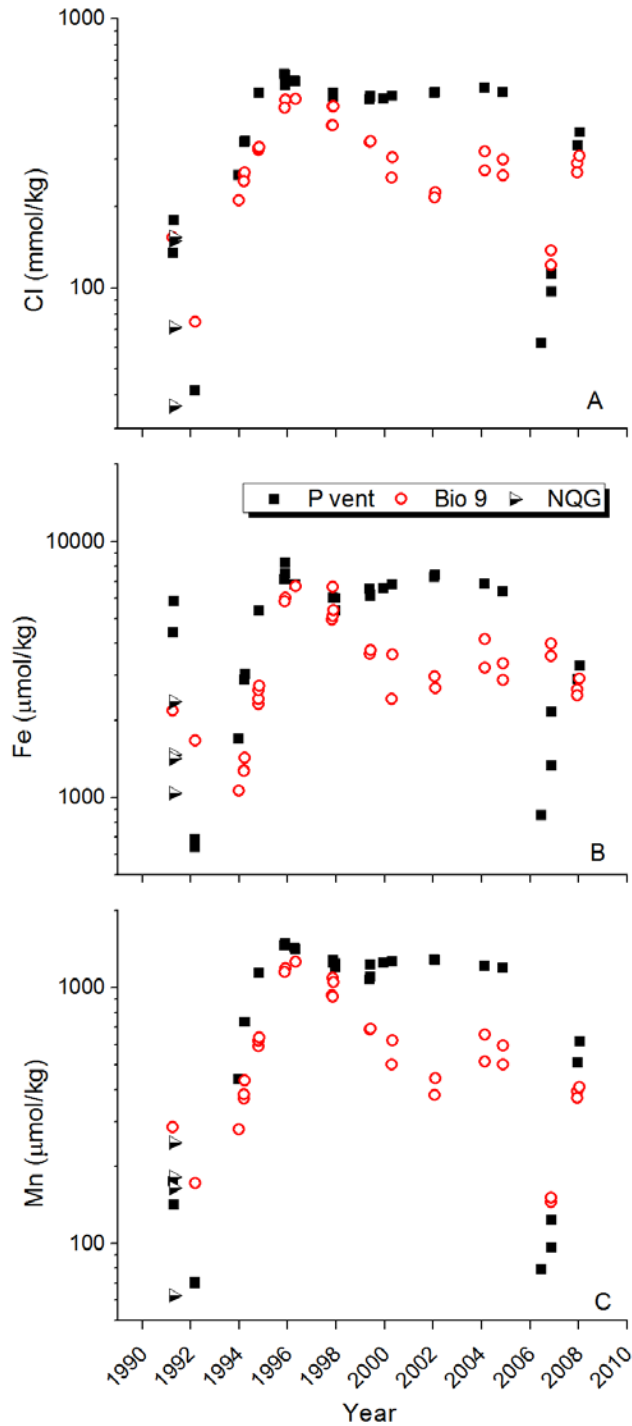

**Supplementary Fig. DR5.** Time-series fluid chemistry (Bryce et al., 2011; Fornari et al., 2012; Von Damm, 2000; 2004, Table DR6) from vent structures P vent and Bio 9 (plus N, Q and G vents in 1991) at EPR, 9°50'N including: A) dissolved Cl, B) dissolved Fe and C) dissolved Mn.



**Table DR1.****Table DR1: Data from flow experiment 1**

| sample | T (°C) | P (bars) | Cl (mm)* | Fe (μm) | Mn (μm) | pH   |
|--------|--------|----------|----------|---------|---------|------|
| 1-S1   | 410    | 341.3    | 573      | 10343   | 1017    | 3.72 |
| 1-V1   | 410    | 309.1    | 376      | 6224    | 579     | 3.36 |
| 1-L1   | 410    | 309.1    | 1751     | 34945   | 3725    |      |
| 1-V2   | 410    | 307.4    | 261      | 3871    | 337     | 3.28 |
| 1-L2   | 410    | 307.4    | 2433     | 47425   | 5049    |      |
| 1-V3   | 410    | 304.9    | 182      | 2405    | 196     | 3.22 |
| 1-L3   | 410    | 304.9    | 2995     | 57440   | 6081    |      |
| 1-V4   | 410    | 302.5    | 140      | 1665    | 130     | 3.17 |
| 1-L4   | 410    | 302.5    | 3536     | 67065   | 7013    |      |
| 1-V5   | 410    | 298.3    | 95       | 958     | 70      | 3.20 |
| 1-L5   | 410    | 298.3    | 4039     | 76735   | 8255    |      |
| 1-V6   | 410    | 293.5    | 66       | 616     | 43      | 3.13 |

\* mm and μm are mmol and μmol per kg solution, respectively

**Table DR2.****Table DR2: Data from flow experiment 2**

| sample | T (°C) | P (bars) | Cl (mm)* | Fe (μm) | Mn (μm) | pH   |
|--------|--------|----------|----------|---------|---------|------|
| 2-S1   | 425    | 372.0    | 924      | 10090   | 1064    | 3.93 |
| 2-V1   | 425    | 356.0    | 832      | 8960    | 904     | 3.64 |
| 2-L1   | 425    | 356.0    | 1507     | 17408   | 1873    | 3.98 |
| 2-V2   | 425    | 353.9    | 612      | 6083    | 572     | 3.45 |
| 2-L2   | 425    | 353.9    | 2327     | 27830   | 2988    | 4.12 |
| 2-V3   | 425    | 349.8    | 340      | 3032    | 249     | 3.32 |
| 2-L3   | 425    | 349.8    | 3147     | 37448   | 3992    | 4.56 |
| 2-V4   | 425    | 345.6    | 234      | 1805    | 142     | 3.25 |
| 2-L4   | 425    | 345.6    | 3732     | 43498   | 4643    | 4.73 |
| 2-V5   | 425    | 336.4    | 132      | 836     | 58      | 3.19 |
| 2-L5   | 425    | 336.4    | 4645     | 53343   | 5660    | 4.55 |
| 2-V6   | 440    | 395.0    | 510      | 4654    | 410     | 3.33 |
| 2-L6   | 440    | 395.0    | 2603     | 30365   | 3308    | 4.19 |
| 2-V7   | 440    | 392.7    | 422      | 3704    | 314     | 3.24 |
| 2-L7   | 440    | 392.7    | 3124     | 36840   | 4028    | 4.26 |
| 2-V8   | 440    | 389.3    | 333      | 2735    | 232     | 3.26 |
| 2-L8   | 440    | 389.3    | 3819     | 44783   | 5235    | 4.57 |
| 2-V9   | 440    | 380.8    | 212      | 1533    | 119     | 3.16 |
| 2-V10  | 439    | 375.2    | 167      | 1121    | 82      | 3.12 |
| 2-V11  | 439    | 364.6    | 114      | 759     | 49      | 3.08 |
| 2-V12  | 439    | 344.5    | 58       | 320     | 18      | 3.01 |
| 2-V13  | 439    | 304.3    | 22       | 125     | 6.2     | 2.80 |

\* mm and μm are mmol and μmol per kg solution, respectively

**Table DR3.**

Table DR3: Data from flow experiment 3

| sample | T (°C) | P (bars) | Cl (mm)* | Fe (μm) | Mn (μm) | pH, 25C |
|--------|--------|----------|----------|---------|---------|---------|
| 3-S1   | 426    | 370.5    | 910      | 2114    | 1907    | 2.84    |
| 3-V1   | 425    | 356.6    | 839      | 1851    | 1735    | 2.75    |
| 3-L1   | 425    | 356.6    | 1948     | 4849    | 4746    | 4.20    |
| 3-V2   | 424    | 354.5    | 795      | 1756    | 1617    | 2.77    |
| 3-L2   | 424    | 354.5    | 2189     | 5479    | 5490    | 4.08    |
| 3-V3   | 424    | 351.8    | 662      | 1361    | 1231    | 2.76    |
| 3-L3   | 424    | 351.8    | 2686     | 6767    | 6804    | 4.40    |
| 3-V4   | 423    | 346.9    | 481      | 928     | 770     | 2.79    |
| 3-L4   | 423    | 346.9    | 3269     | 8224    | 8101    | 4.60    |
| 3-V5   | 422    | 342.1    | 332      | 573     | 441     | 2.76    |
| 3-L5   | 422    | 342.1    | 3565     | 9434    | 8786    | 5.24    |
| 3-V6   | 421    | 335.8    | 212      | 330     | 232     | 2.74    |
| 3-L6   | 421    | 335.8    | 3901     | 9633    | 9295    | 5.12    |
| 3-V7   | 420    | 327.2    | 131      | 180     | 116     | 2.73    |
| 3-V8   | 420    | 315.0    | 69       | 79      | 42      | 2.72    |
| 3-V9   | 420    | 297.7    | 36       | 37      | 18      | 2.69    |
| 3-V10  | 464    | 297.7    | 13       | 21      | 5.6     | 2.57    |
| 3-V11  | 465    | 267.9    | 9.5      | 28      | 13      | 2.43    |
| 3-V12  | 466    | 247.4    | 9.1      | 33      | 15      | 2.30    |

\* mm and μm are mmol and umol per kg solution, respectively

**Table DR4.**

Table DR4: Data from flow experiment 4

| sample | T (°C) | P (bars) | Cl (mm)* | Fe (μm) | Mn (μm) | pH   |
|--------|--------|----------|----------|---------|---------|------|
| 4-S1   | 410    | 320      | 634      | 164     | 2020    |      |
| 4-V1   | 410    | 308.3    | 501      | 99      | 1576    |      |
| 4-L1   | 410    | 308.3    | 2328     | 892     | 8962    |      |
| 4-V2   | 410    | 308.2    | 488      | 93      | 1528    |      |
| 4-L2   | 410    | 308.2    | 1956     | 652     | 7536    |      |
| 4-V3   | 410    | 308.2    | 371      | 43      | 1084    |      |
| 4-L3   | 410    | 308.2    | 1422     | 574     | 5266    |      |
| 4-V4   | 410    | 305.3    | 224      | 28      | 464     |      |
| 4-V5   | 410    | 304.9    | 183      | 16      | 350     |      |
| 4-L5.1 | 410    | 304.9    | 3103     | 672     | 10605   |      |
| 4-L5.2 | 410    | 304.9    | 2930     | 576     | 10134   |      |
| 4-L5.3 | 410    | 304.9    | 2761     | 517     | 9301    |      |
| 4-L5.4 | 410    | 304.9    | 2382     | 460     | 8002    |      |
| 4-V6   | 411    | 299.5    | 84       | 6.5     | 106     |      |
| 4-L6.1 | 411    | 299.5    | 3738     | 601     | 12263   |      |
| 4-L6.2 | 411    | 299.5    | 2966     | 247     | 9827    |      |
| 4-L6.3 | 411    | 299.5    | 2694     | 216     | 8582    |      |
| 4-L6.4 | 411    | 299.5    | 2449     | 172     | 7795    |      |
| 4-V7   | 409    | 288.8    | 52.64    | 5.3     | 52      | 3.22 |
| 4-V8   | 409    | 250.0    | 12.71    | 3.2     | 7.8     | 3.11 |
| 4-V9   | 431    | 250.0    | 8.20     | 3.3     | 4.3     | 2.92 |
| 4-V10  | 453    | 250.0    | 6.45     | 3.3     | 4.9     | 2.74 |

\* mm and μm are mmol and umol per kg solution, respectively

**Table DR5.**

Table DR5: Data from flow experiment 5

| sample | T (°C) | P (bars) | Cl (mm)* | Fe (μm) | Mn (μm) | pH   |
|--------|--------|----------|----------|---------|---------|------|
| 5-S2   | 440    | 400      | 953      | 1175    | 984     | 2.78 |
| 5-V1   | 440    | 398      | 930      | 1180    | 955     | 2.72 |
| 5-V2   | 439    | 394      | 816      | 1062    | 823     | 2.70 |
| 5-V3   | 439    | 392      | 661      | 798     | 602     | 2.67 |
| 5-B4   | 438    | 390      | 3258     | 4656    | 4074    | 3.84 |
| 5-V5   | 438    | 387      | 541      | 635     | 444     | 2.67 |
| 5-V6   | 438    | 384      | 370      | 378     | 247     | 2.66 |
| 5-V7   | 438    | 379      | 287      | 277     | 168     | 2.65 |
| 5-V8   | 437    | 368      | 173      | 147     | 79      | 2.63 |
| 5-V9   | 437    | 361      | 130      | 103     | 51      | 2.62 |
| 5-V10  | 437    | 351      | 95       | 82      | 32      | 2.63 |
| 5-V11  | 436    | 323      | 42       | 49      | 10.0    | 2.61 |
| 5-V12  | 437    | 282      | 15       | 22      | 2.5     | 2.55 |
| 5-V13  | 437    | 255      | 10.2     | 21      | 1.51    | 2.52 |
| 5-V14  | 438    | 237      | 8.1      | 18      | 2.8     | 2.41 |
| 5-V15  | 439    | 220      | 8.5      | 21      | 5.5     | 2.19 |

\* mm and μm are mmol and μmol per kg solution, respectively

**Table DR6.**Table DR6: Selected end-member vent fluid chemistry from EPR, 9°50'N<sup>A</sup>

| Vent                                  | $T_{\text{exit}}$ (°C) | # samples | Mg <sub>min</sub> (mm) | Cl (mm)* | Fe (μm)    | Mn (μm)   | Si (mm)    | H <sub>2</sub> (μmol/L) |
|---------------------------------------|------------------------|-----------|------------------------|----------|------------|-----------|------------|-------------------------|
| <u>February, 2004</u>                 |                        |           |                        |          |            |           |            |                         |
| Bio9                                  | 366                    | 3         | 1.5                    | 321 ± 4  | 4162 ± 391 | 655 ± 28  | 10.2 ± 1.2 | 373 ± 37                |
| Bio9'                                 | 383                    | 3         | 3.4                    | 273 ± 3  | 3224 ± 499 | 512 ± 44  | 9.9 ± 1.0  | na                      |
| P-vent                                | 364                    | 6         | 1.3                    | 552 ± 6  | 6847 ± 274 | 1216 ± 49 | 14.7 ± 0.6 | 183 ± 18                |
| <u>December, 2007 - January, 2008</u> |                        |           |                        |          |            |           |            |                         |
| Bio 9                                 | 330                    | 2         | 1.9                    | 309 ± 11 | 2912 ± 116 | 407 ± 16  | 10.0 ± 0.4 | 1060 ± 106              |
| P vent                                | 374                    | 3         | 2.0                    | 379 ± 7  | 3262 ± 130 | 616 ± 25  | 11.8 ± 0.5 | 525 ± 53                |

A) see methods for further details \* mm and μm are mmol and μmol per kg solution, respectively

## References

- Bryce, J., Prado, F., and Von Damm, K., 2011, Marine Geoscience Data System, [www.marine-geo.org](http://www.marine-geo.org), doi:10.1594/IEDA/100031.
- Driesner, T., and Heinrich, C. A., 2007, The system H<sub>2</sub>O-NaCl. Part I: Correlation formulae for phase relations in temperature-pressure-composition space from 0 to 1000°C, 0 to 5000 bar, and 0 to 1 X<sub>NaCl</sub>: *Geochimica et Cosmochimica Acta*, v. 71, p. 4880-4901.
- Fornari, D. J., Von Damm, K. L., Bryce, J. G., Cowen, J. P., Ferrini, V., Fundis, A., Lilley, M. D., Luther III, G. W., Mullineaux, L. S., Perfit, M. R., Meana-Prado, M. F., Rubin, K. H., Seyfried, W. E., Jr., Shank, T. M., Soule, S. A., Tolstoy, M., and White, S. M., 2012, The East Pacific Rise between 9°N and 10°N: Twenty-five years of integrated, multidisciplinary oceanic spreading center studies: *Oceanography*, v. 25, p. 18-43.
- Foustoukos, D. I., and Seyfried, W. E., Jr., 2007a, Fluid phase separation processes in submarine hydrothermal systems, *in* Liebscher, A., and Heinrich, C. A., eds., *Fluid-Fluid Interactions*, Rev. Mineral. Geochem. 65: Chantilly, VA., MSA, p. 213-239.
- Foustoukos, D. I., and Seyfried, W. E., Jr., 2007b, Trace element partitioning between vapor, brine and halite under extreme phase separation conditions *Geochimica et Cosmochimica Acta*, v. 71, p. 2056-2071.
- Pester, N. J., Rough, M., Ding, K., and Seyfried, W. E., Jr., 2011, A new Fe/Mn geothermometer for hydrothermal systems: Implications for high-salinity fluids at 13°N on the East Pacific Rise: *Geochimica et Cosmochimica Acta*, v. 75, p. 7881-7892.
- Von Damm, K. L., 2000, Chemistry of hydrothermal vent fluids from 9°-10°N, East Pacific Rise: "Time zero," the immediate post-eruptive period: *Journal of Geophysical Research*, v. 105, p. 11203-11222.
- Von Damm, K. L., 2004, Evolution of the hydrothermal system at East Pacific Rise 9°50'N: Geochemical evidence for changes in the upper oceanic crust, *in* German, C. R., Lin, J., and Parson, L. M., eds., *Mid-Ocean Ridges: Hydrothermal Interactions Between the Lithosphere and Oceans*, Geophys. Monogr. Ser., 148: Washington, D.C., AGU, p. 285-305.
- Von Damm, K. L., and Lilley, M. D., 2004, Diffuse flow hydrothermal fluids from 9°50'N East Pacific Rise: Origin, evolution and biogeochemical controls, *in* Wilcock, W. S., Cary, C., De Long, E., Kelley, D., and Barross, J., eds., *The Subseafloor Biosphere at Mid-Ocean Ridges*, Geophys. Monogr. Ser., 144: Washington, D.C., AGU, p. 245-268.
